# Supplementary material for: Selective growth of highly crystalline hydroxyapatite in a micro-reaction cell of agar gel
Source: Royal Society of Chemistry journal article supplement (doi:10.1039/c0ce00079e), 2010-10-06
Supplement: c0ce00079e.pdf [file c0ce00079e.pdf]

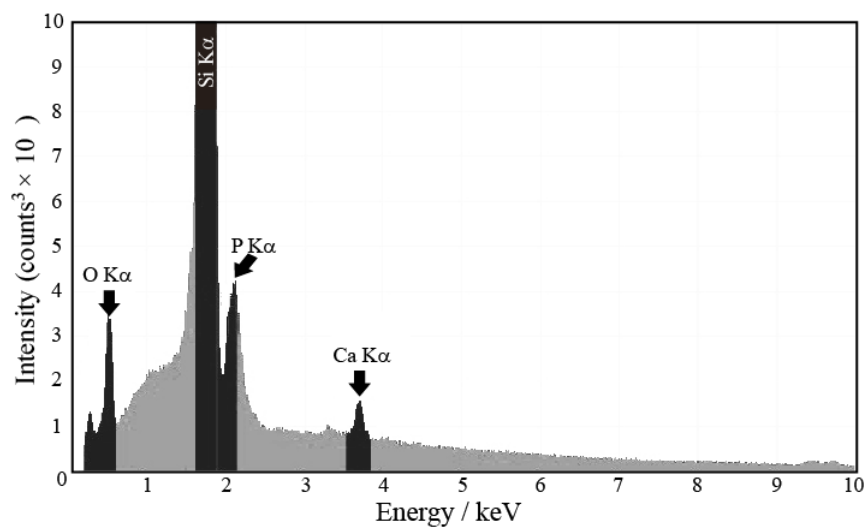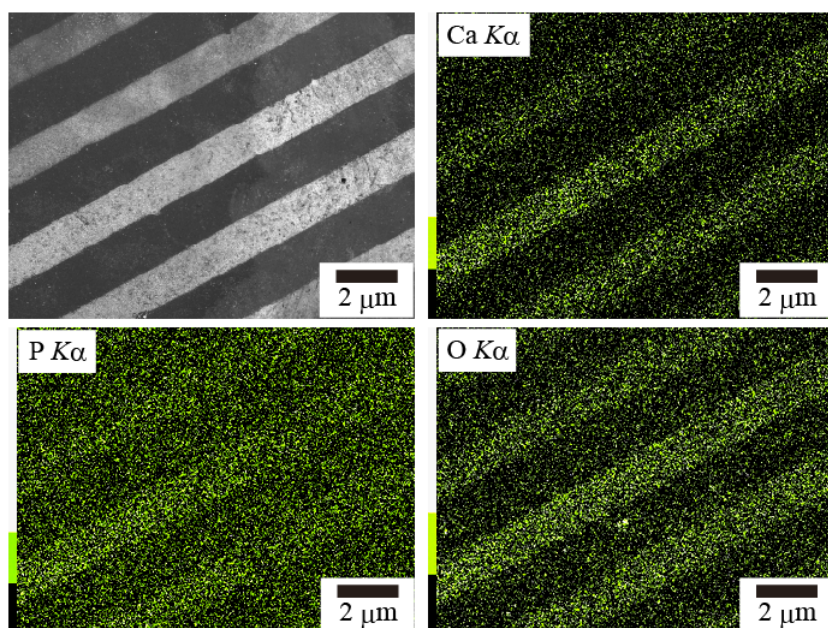

Supporting Fig. 1 EDS spectrum and mapping data of HAp nanocrystals that were grown on the hydrophilic surface for 20 days.

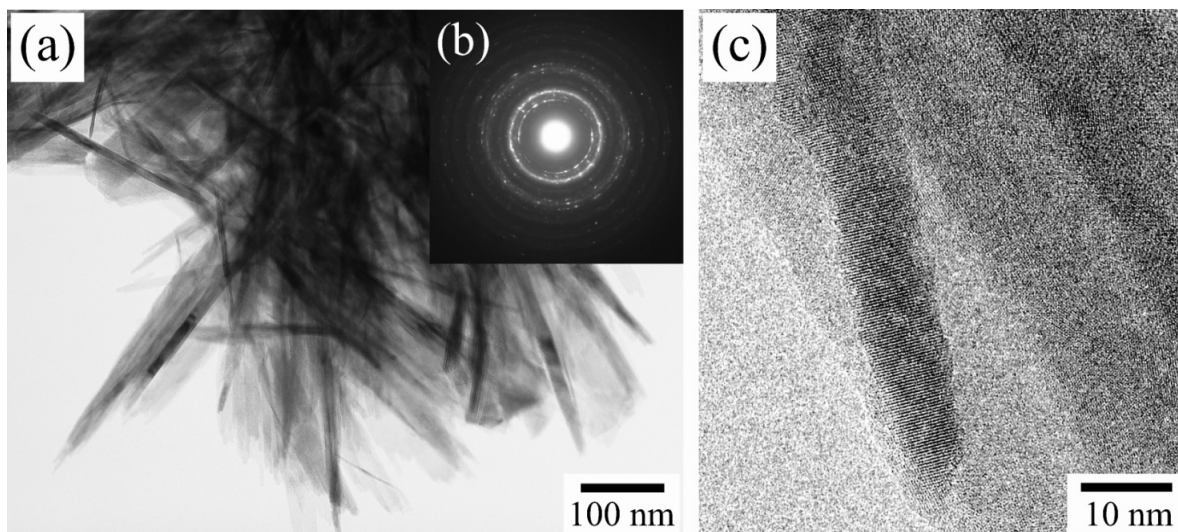

Supporting Fig. 2 (a) Bright-field TEM micrograph. (b) SAED pattern and (c) lattice image of typical 1-D HAp nanowhiskers.
